# Supplementary material for: Nanoencapsulated betulinic acid analogue distinctively improves colorectal carcinoma in vitro and in vivo
Source: Sci Rep. 2019 Aug 8;9:11506. doi: 10.1038/s41598-019-47743-y (PMC6687831; doi:10.1038/s41598-019-47743-y)
Supplement: Supplementary file 1 — Supplementary Figure S1,Supplementary Figure S2, Supplementary Figure S3, Supplementary Figure S4, Supplementary Figure S5, Supplementary Figure S6, Supplementary Figure S7, [file 41598_2019_47743_MOESM1_ESM.pdf]

# **Nanoencapsulated betulinic acid analogue distinctively improves colorectal carcinoma *in vitro* and *in vivo***

**Debasmita Dutta<sup>a</sup>, Brahamacharry Paul<sup>c</sup>, Biswajit Mukherjee<sup>a\*</sup>, Laboni Mondal<sup>a</sup>, Suparna Sen<sup>b</sup>, Chinmay Chowdhury<sup>b</sup>, Mita Chatterjee Debnath<sup>c</sup>**

<sup>a</sup> Department of Pharmaceutical Technology, Jadavpur University, Kolkata 700032, India.

<sup>b</sup> Organic and Medicinal Chemistry Division, CSIR- Indian Institute of Chemical Biology, Kolkata 700032, India.

<sup>c</sup> Infectious Diseases and Immunology Division, CSIR- Indian Institute of Chemical Biology, Kolkata 700032, India.

\*Corresponding Author

Professor (Dr.) Biswajit Mukherjee

Department of Pharmaceutical Technology,

Jadavpur University, Kolkata-700032, India

Telephone: +91-33-2457 2588

Fax: +91-33-2414 6677

Email: biswajit.mukherjee@jadavpuruniversity.in/ biswajit55@yahoo.com.

## Supplementary information

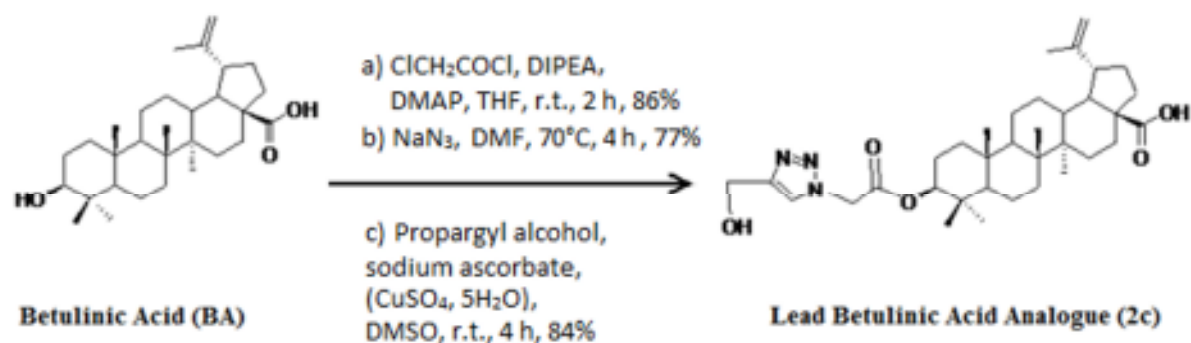

**Supplementary Figure S1.** Betulinic acid (BA) and the scheme used for synthesis of its bio-active analogue, **2c**.

**a**

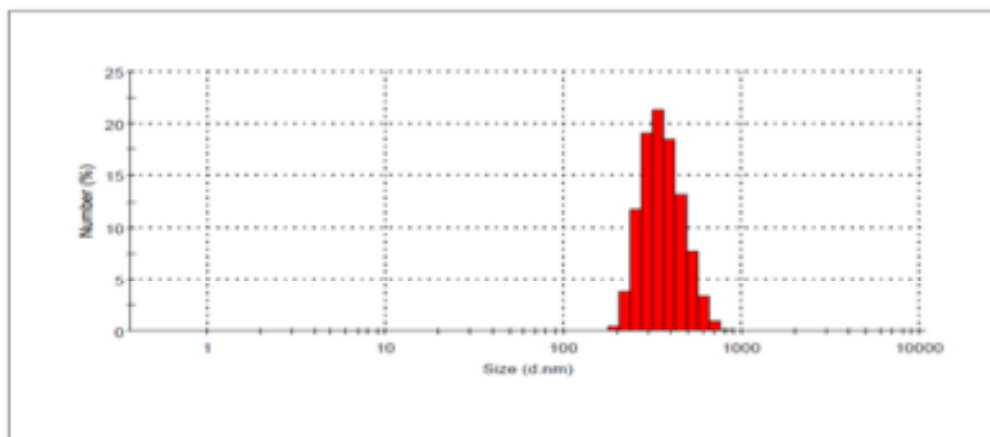

**b**

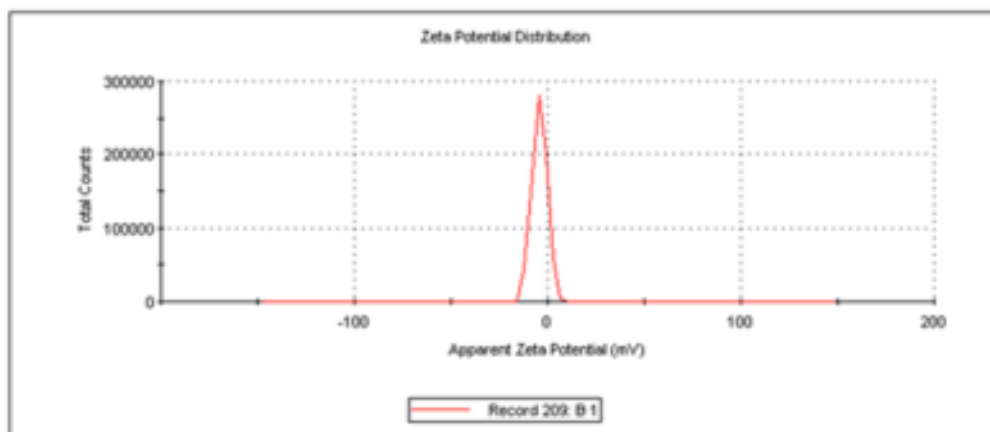

**Supplementary Figure S2.** Representative data of (a) Average particle size distribution and (b) zeta potential of nanoformulation, **2c-NP**.

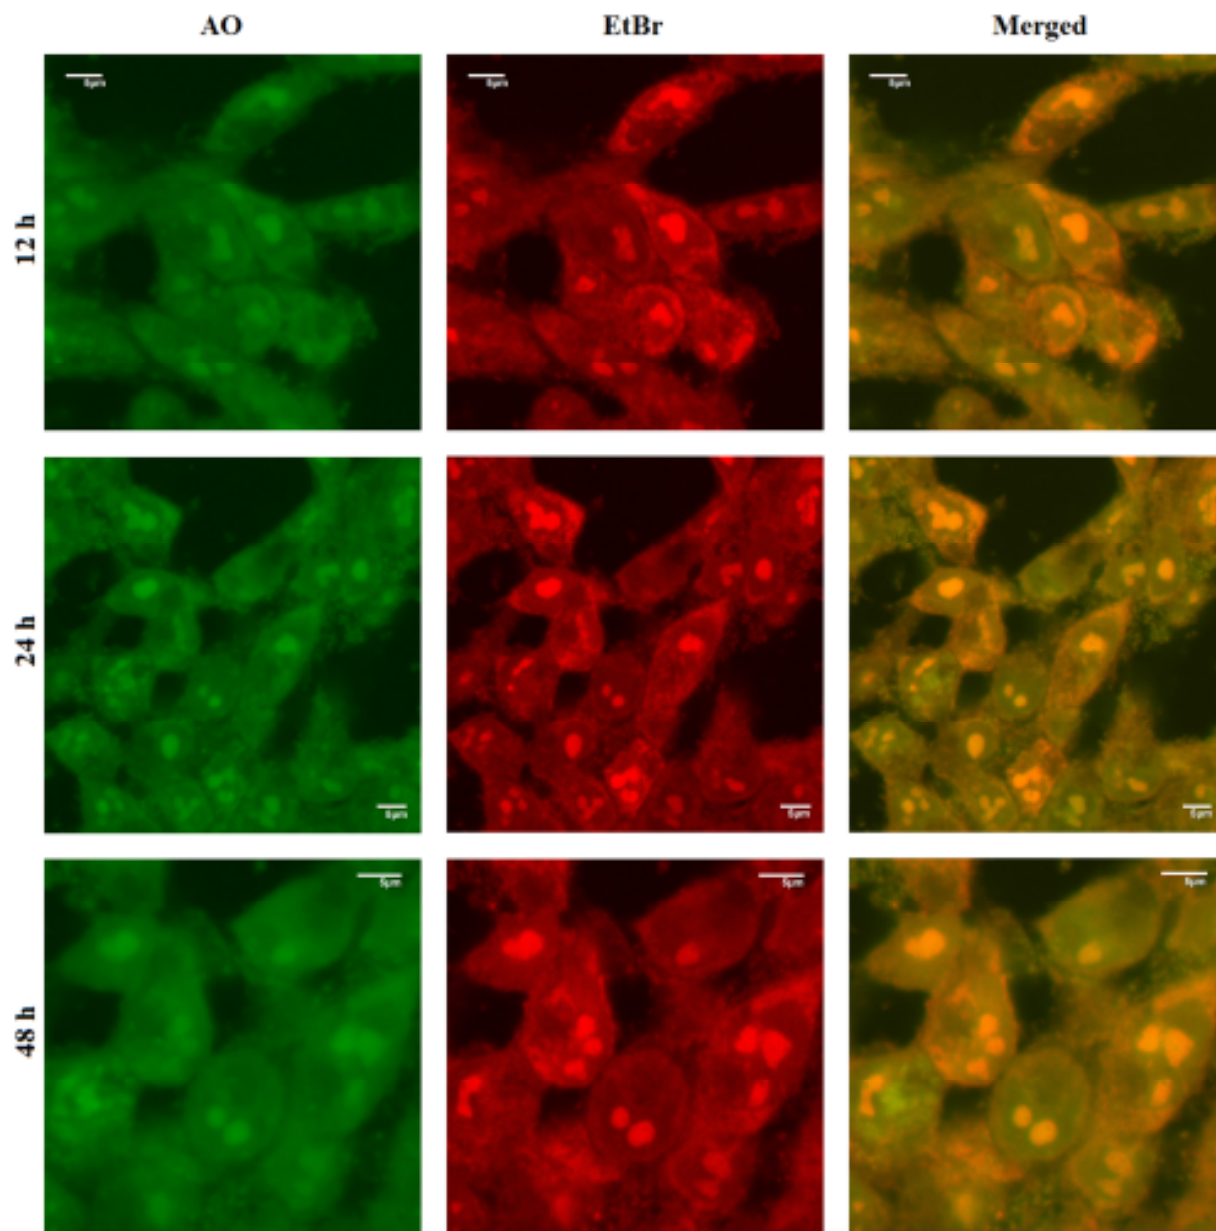

**Supplementary Figure S3. Representative image of Acridine Orange/ Ethidium Bromide (AO/EB) staining on higher zooming.** Confocal microscopy images of HT-29 cells after treatment with **2c-NP** (11.8  $\mu$ M; 0–48 h) followed by staining with acridine orange (4  $\mu$ g/ml) and ethidium bromide (4  $\mu$ g/ml) captured under Olympus Fluoview 10i confocal microscope at 150X magnification. Scale bar represents 5  $\mu$ m for 12h, 48h and 10  $\mu$ m for 24h.

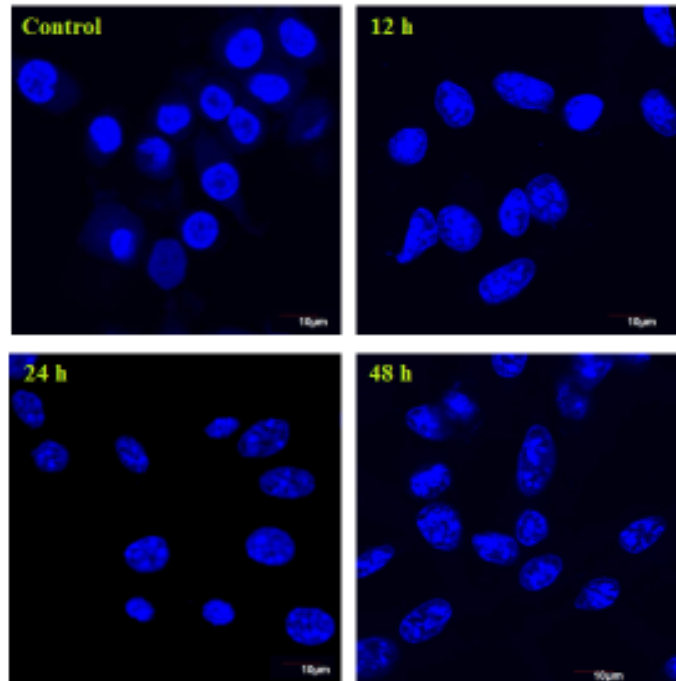

**Supplementary Figure S4. Representative image of DNA degradation and apoptotic bodies formation induced by 2c-NP.** Control and 2c-NP (11.8  $\mu$ M; 0–48 h) treated HT-29 cells ( $2.5 \times 10^4$ / ml of RPMI 1640 medium/well) stained with Hoechst 33258 were observed under a Leica confocal microscope (100X). The figure is a representative profile of at least three experiments.

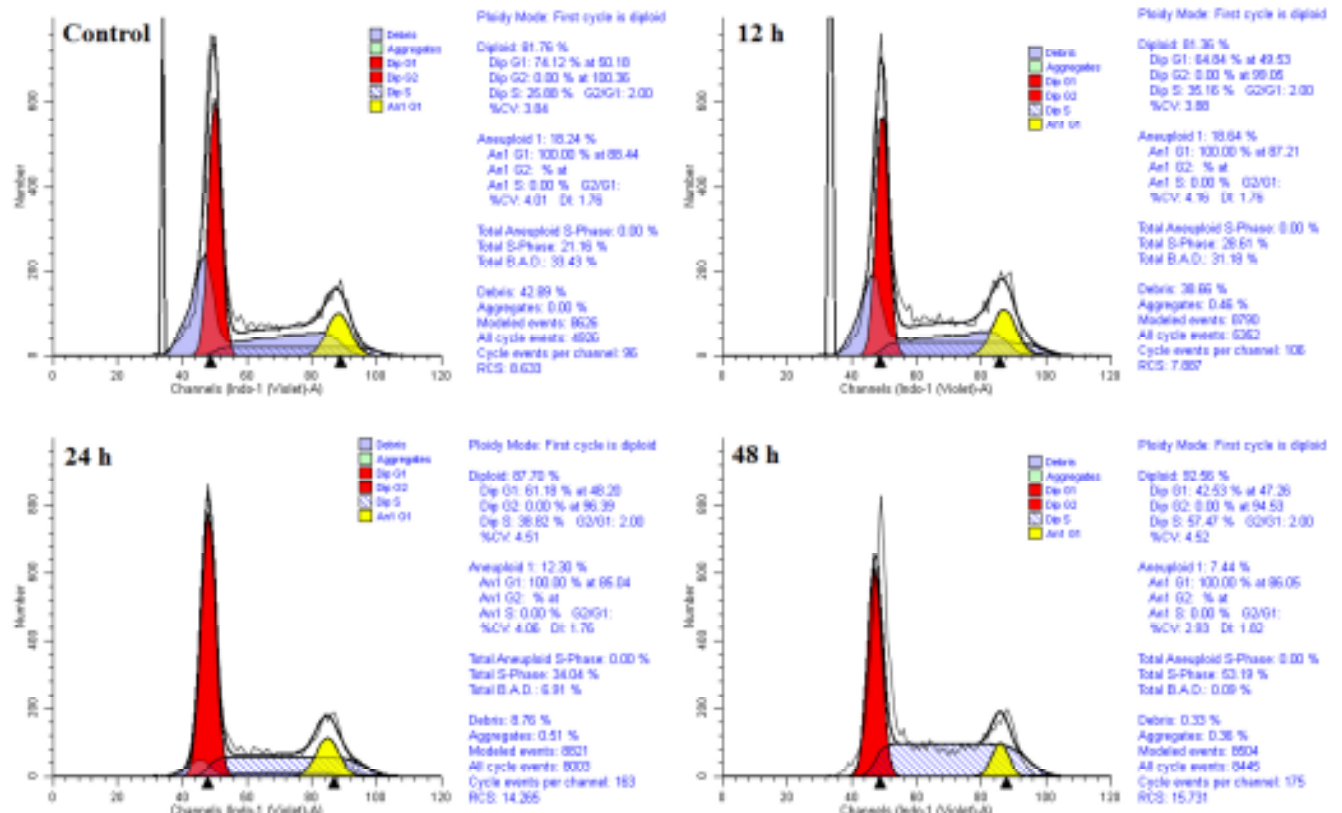

**Supplementary Figure S5.** Datasheet of cell cycle arrest in HT-29 cells after treatment with 2c-NP for different time points. The data has been analyzed using Modfit software.

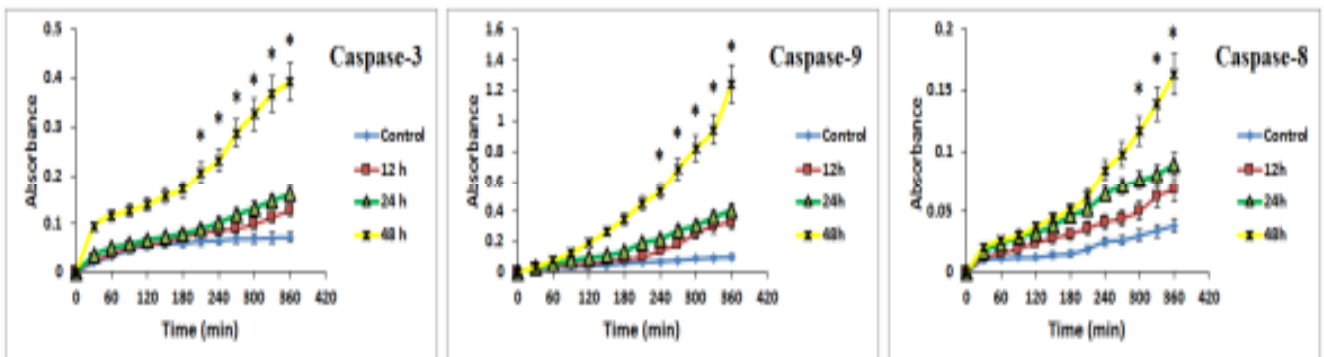

**Supplementary Figure S6.** Enzymatic analysis of caspase -3, -9 and -8 expression in HT-29 cells after exposure to 2c-NP for 12 h, 24 h and 48 h.

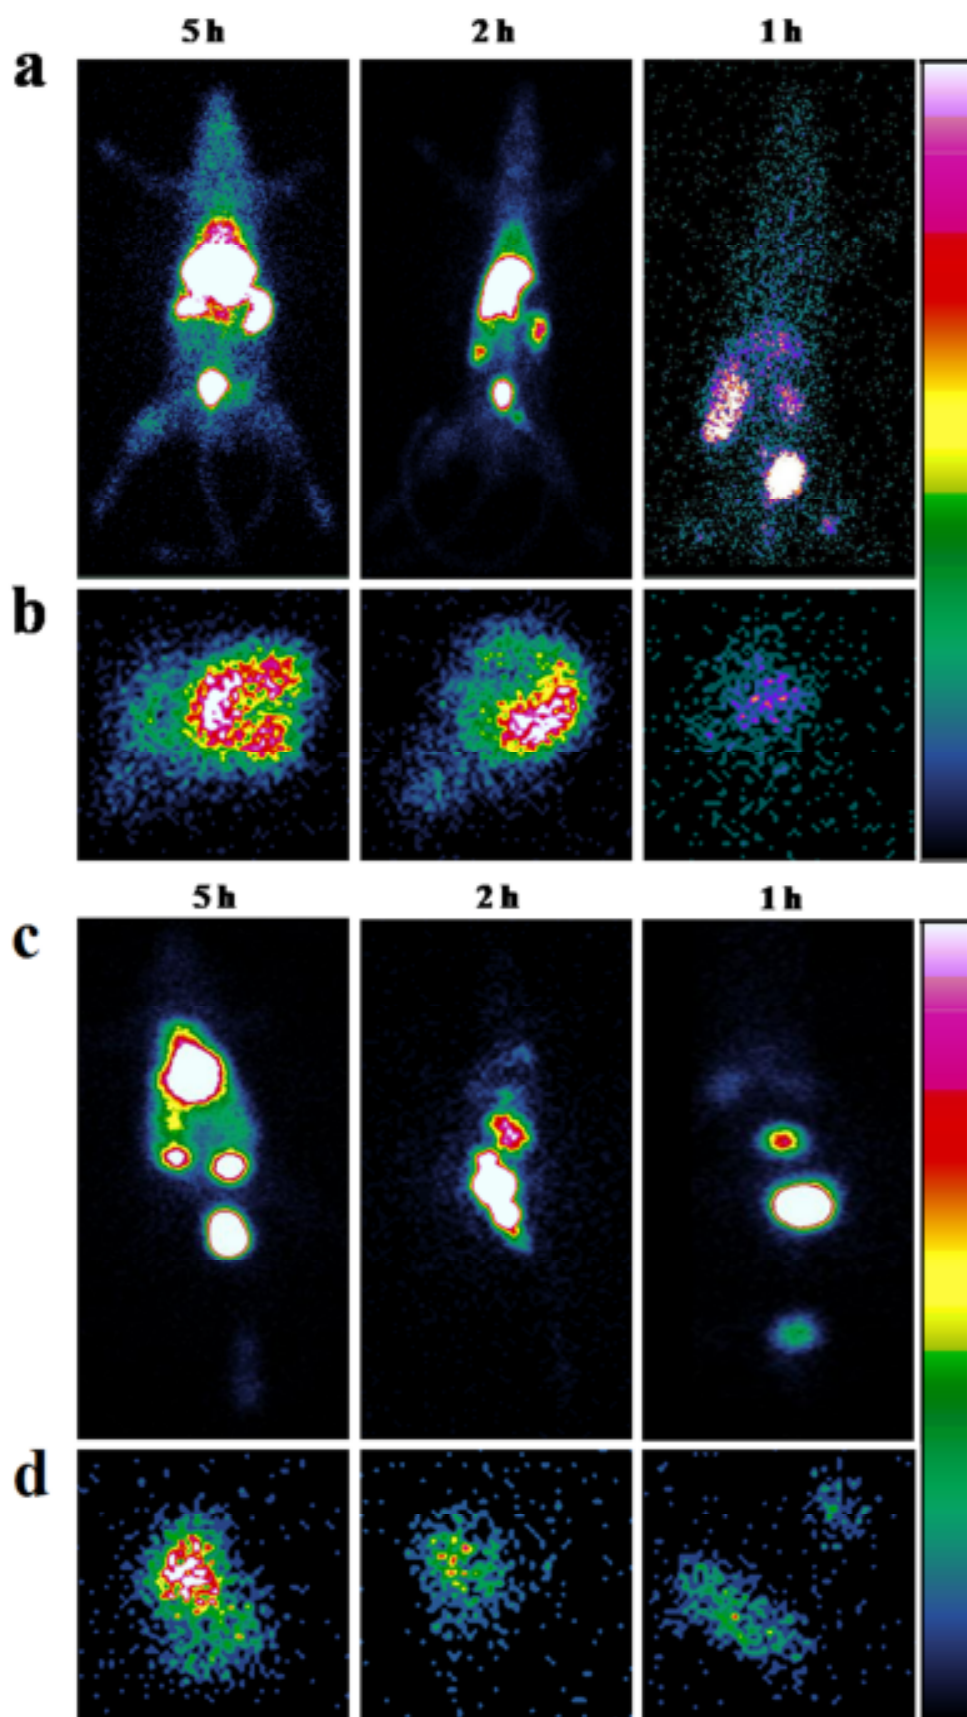

**Supplementary Figure S7.** Representative images of *In vivo* Gamma scintigraphy of CRC animals. (a) Gamma scintigraphic images of Sprague Dawley rats at 1h, 2h and 5h post treatment of  $^{99m}\text{Tc}$  – radiolabeled **2c-NP**. (b) Colons isolated from aforementioned animals. (c) Gamma scintigraphic images of Swiss albino mice at 1h, 2h and 5h post treatment of  $^{99m}\text{Tc}$  – radiolabeled **2c-NP**. (d) Colons isolated from aforementioned animals.

**Supplementary Table T1:** IC<sub>50</sub> values of **2c** and **2c-NP** on different colorectal cancer cell lines and normal cell lines

| Cell Line                                  | <b>2c</b> (μM) | <b>2c-NP</b> (μM) |
|--------------------------------------------|----------------|-------------------|
| HT 29 (CRC)                                | 14.9 ± 1.3     | 11.8 ± 1.1        |
| HCT 116 (CRC)                              | 23.8 ± 1.5     | 19.5 ± 1.1        |
| HCT 15 (CRC)                               | 21.6 ± 1.2     | 17.7 ± 1.6        |
| HEK 293 (Normal kidney cells)              | >50            | >50               |
| CCD-33-C <sub>O</sub> (Normal colon cells) | >50            | >50               |

**Supplementary Table T2:** Regression coefficient values ( $R^2$ ) and release exponents as obtained from in vitro drug release data tested on different kinetic models.

| <i>In-vitro</i> release kinetic models | <b>2c-NP</b>       |                         |
|----------------------------------------|--------------------|-------------------------|
|                                        | $R^2$ Value        | Representing Equations  |
| Zero Order                             | 0.739              | $y = 0.0505x + 28.876$  |
| First Order                            | 0.8659             | $y = -0.0005x + 1.8478$ |
| Higuchi                                | 0.9209             | $y = 2.0423x + 15.641$  |
| Korsmeyer Peppas                       | 0.9028<br>n= 0.403 | $y = 0.4036 x + 0.808$  |
| Hixon Crowell                          | 0.8273             | $y = -0.0013x + 4.1306$ |

**Supplementary Table T3:** Animal groups and specifications

| <b>Animal Group</b>           | <b>Number of animals in each group</b> | <b>Specification</b>                                                                                |
|-------------------------------|----------------------------------------|-----------------------------------------------------------------------------------------------------|
| Group I - Normal control      | Ten rats and ten mice                  | Received normal food and water <i>ad libitum</i>                                                    |
| Group II - Carcinogen control | Forty rats and fifty mice              | Received carcinogen with normal food and water <i>ad libitum</i>                                    |
| Group III- Carcinogen treated | Ten rats and ten mice                  | Received <b>2c-NP</b> after carcinogen treatment along with normal food and water <i>ad libitum</i> |
| Group IV – Normal treated     | Ten rats and ten mice                  | Received <b>2c-NP</b> along with normal food and water <i>ad libitum</i>                            |
